# Supplementary material for: Iron oxide decorated N-doped carbon derived from poly(ferrocene-urethane) interconnects for the oxygen reduction reaction
Source: Royal Society of Chemistry journal article supplement (doi:10.1039/c8nj02529k), 2018-01-01
Supplement: c8nj02529k1.pdf [file c8nj02529k1.pdf]

## **SUPPORTING INFORMATION**

Iron oxide decorated N-doped carbon derived from Poly (ferrocene-urethane)  
interconnects for oxygen reduction reaction

Naveen Chandrasekaran\*, Viji Premkumar, Kanagaraj Madasamy, Murugavel  
Kathiresan\*, Pandiyaraj Kanagavalli, Shanmugam Senthil Kumar\*

*CSIR-Central Electrochemical Research Institute, Karaikudi, Tamil Nadu, 630 003, India.*

*Email: naveen@cecri.res.in, naveenumr@gmail.com, kathiresan@cecri.res.in, and  
ssenthilmugam@gmail.com*

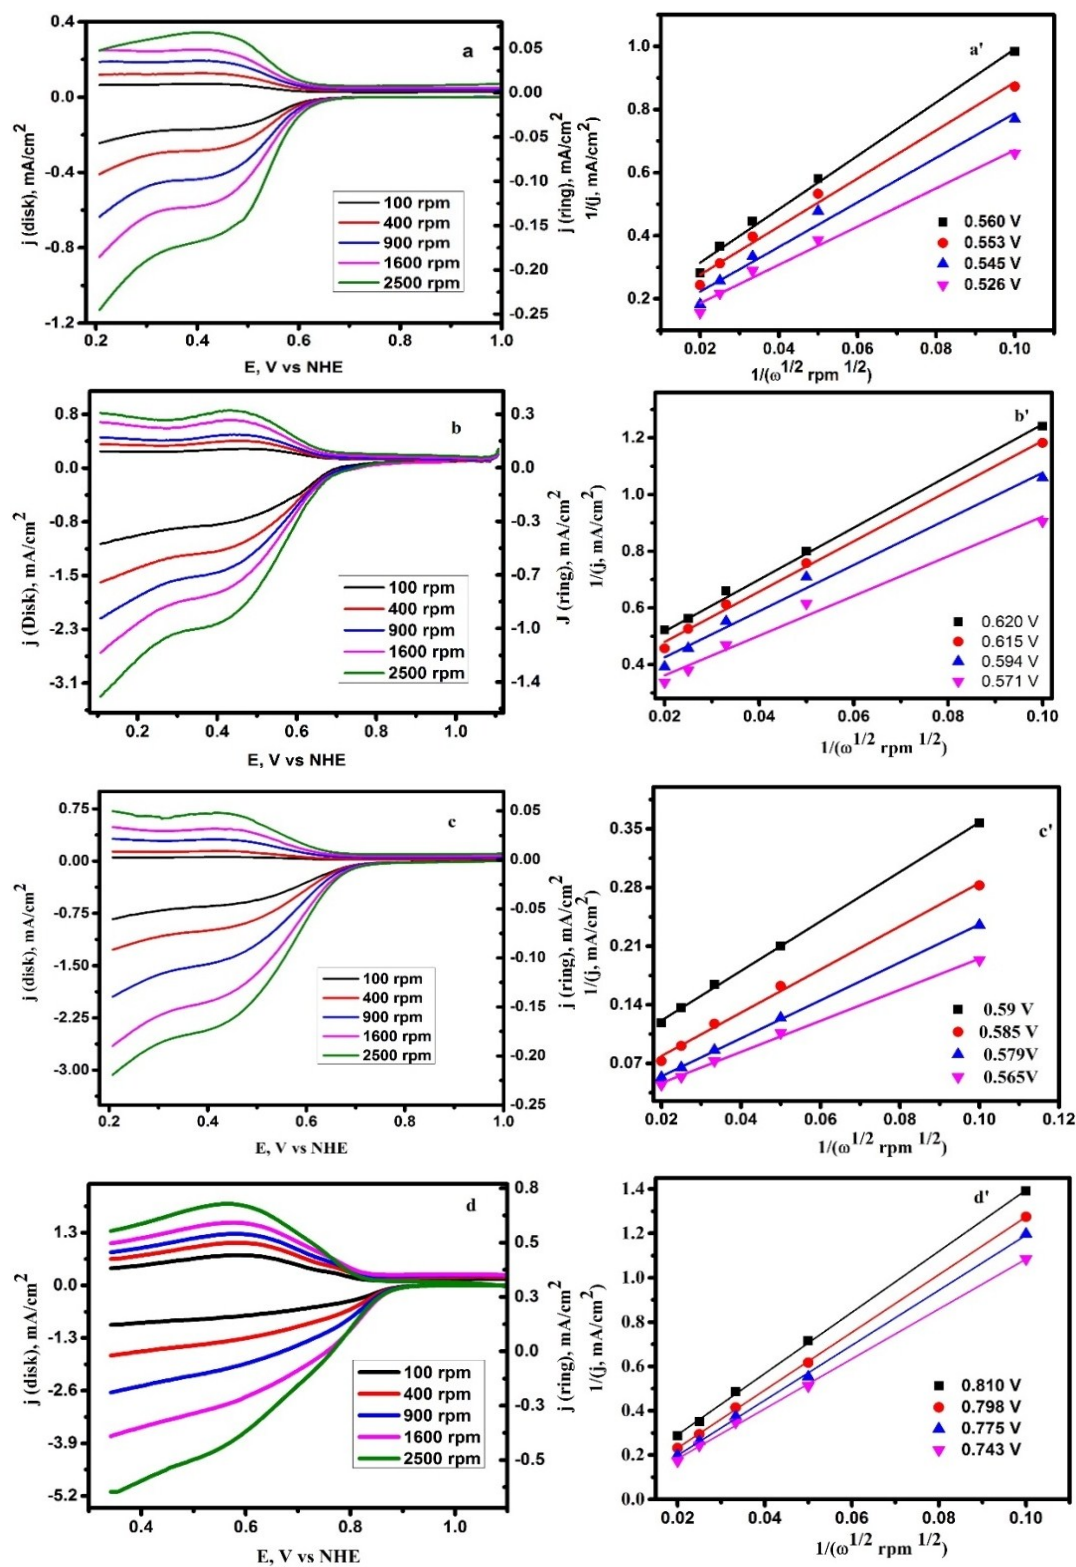

**Figure S-1.** Steady state LSV responses of RRDE at different rotation rates in the scan rate of 0.005 V/s in O<sub>2</sub> gas saturation 0.1 M KOH and its corresponding K-L plots for (a-a') PFU-600; (b-b') PFU-800; (c-c') PFU-1000 and (d-d') F-P-800

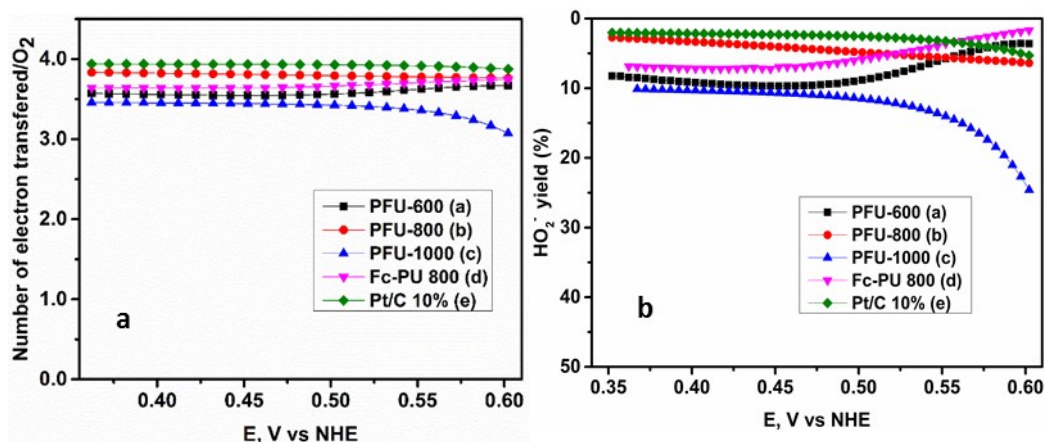

**Figure-S-2.** (a) Number of electron transferred per oxygen and (b) the  $\text{HO}_2^-$  yield (%) of PFU modified electrocatalysts on glassy carbon disk electrode synthesized at different temperatures (Calculated from LSV response from RRDE at 1600 rpm)

| Material   | Number of electrons, n<br>(calculated from B value) | % $\text{H}_2\text{O}_2$ at 0.45 V |
|------------|-----------------------------------------------------|------------------------------------|
| PFU - 600  | 3.6                                                 | 15.7                               |
| PFU - 800  | 3.9                                                 | 5.6                                |
| PFU - 1000 | 3                                                   | 41.5                               |
| F - P- 800 | 3.2                                                 | 37.8                               |

**Table-S1-** Number of electrons (n) and % $\text{H}_2\text{O}_2$  generated for PFU pyrolyzed at different temperatures and F-P-800

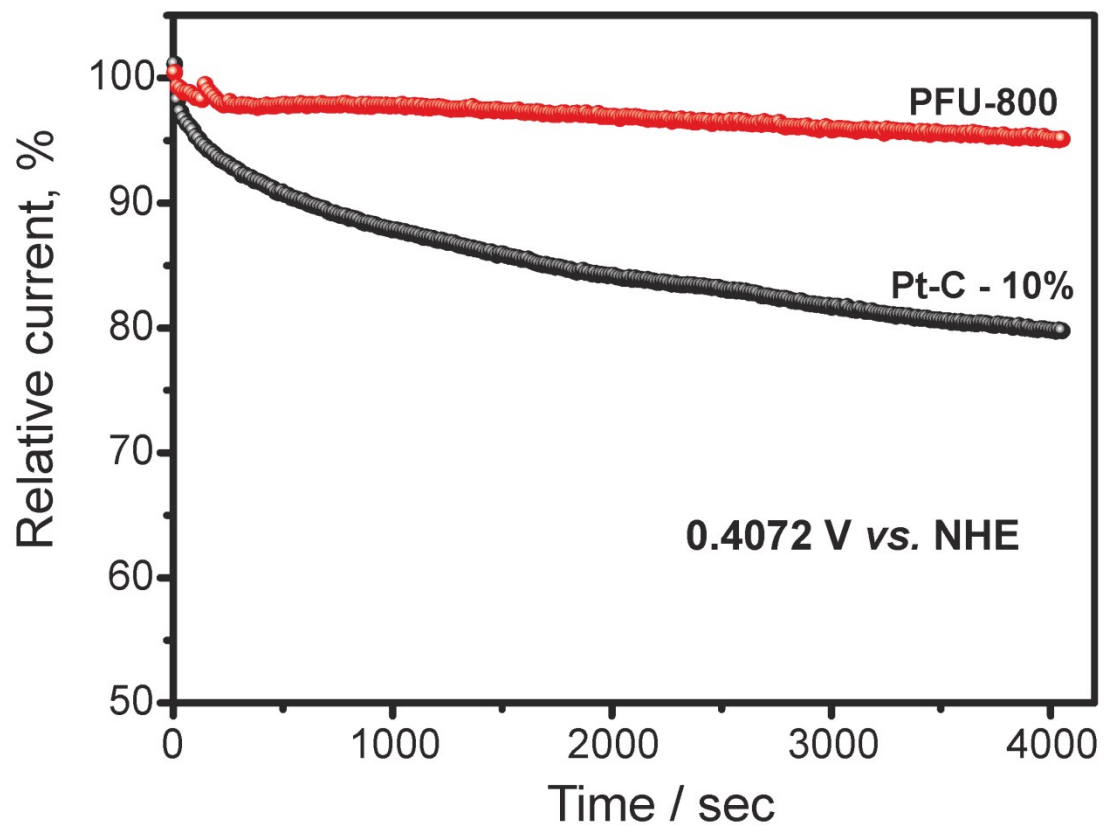

**Figure S-3.** Chronoamperometry of PFU-800 and Pt-C-10% stepped at a potential of 0.41 V vs. NHE in 0.1 M KOH.
